# Supplementary material
Source: publisher figshare collection journal article supplement (https://springernature.figshare.com/ndownloader/files/7427152)
Supplement: Supplementary file [file 7427152]

Additional file 2

**ACADEMIC EXCHANGE PROGRAM YALE-KSMU**  
**Participant questionnaire**

Please take a few minutes of your time to fill out this questionnaire. This exchange program is of great value and significance for both Institutions. We hope to receive very sincere feedback from you regarding this project, which will help in its development and improvement in the future.

**I. Personal Data**

Full Name \_\_\_\_\_

Date of Birth: \_\_\_\_/\_\_\_\_/\_\_\_\_

**II. Participation in the Program**

Please specify the dates that you participated in the exchange program (month, year):

From \_\_\_\_/\_\_\_\_ to \_\_\_\_/\_\_\_\_

In which specialty (department) did you have the rotation: \_\_\_\_\_

**III. Position at the time of participation in the exchange program**

- ☐ Student \_\_\_\_ year \_\_\_\_\_ faculty
- ☐ Resident (year and department) \_\_\_\_\_
- ☐ PhD student (year and department) \_\_\_\_\_
- ☐ Lecturer (department) \_\_\_\_\_
- ☐ Associate Professor (department) \_\_\_\_\_
- ☐ Professor (department) \_\_\_\_\_
- ☐ Other (explain briefly) \_\_\_\_\_

**IV. Present employment and position**

Institution/Organization \_\_\_\_\_

Position \_\_\_\_\_

Degree (please specify degree award date) \_\_\_\_\_

**Please list your occupational responsibilities:**

- ☐ Clinical work
- ☐ Scientific work in the hospital/clinic
- ☐ Scientific work in the lab
- ☐ Combination of clinical and scientific research activities
- ☐ Teacher
- ☐ Administrative position
- ☐ Other (specify briefly) \_\_\_\_\_

## V. Obtaining information about the program and participating in it

How did you find out about this exchange program project?

- ☐ Official announcement from KSMU or Yale University (web-site, newspaper, etc)
- ☐ Heard from a colleague
- ☐ Was informed by the International Department of KSMU
- ☐ Was informed by American colleagues
- ☐ By chance

Did you have to go through an official selection procedure in order to participate in this exchange program?

- ☐ Yes. **Please specify:** testing, interviewing, questionnaire
- ☐ No

## VI. Your expectation regarding the exchange program

**What was your pre-departure goal/aim for participating in the program (please select one most appropriate answer)**

- ☐ to improve my clinical knowledge and skills
- ☐ to conduct a scientific research project
- ☐ to improve knowledge of English language
- ☐ to get acquainted with the system of medical education and healthcare in the USA
- ☐ to explore the country and travel
- ☐ other, please specify \_\_\_\_\_

## VII. Your exchange program experience

---

***Please describe your activities during the exchange program:***

### *I. Observation and following patients*

Observation/Participation in operative procedures:

- In the operating room ☐
- On the wards ☐ In the clinic ☐
- Daily rounds with the team ☐
- Night shifts in the hospital ☐

### *II. Participation in the education process*

- Morning Reports ☐
- Noon/Lunch time reports ☐
- Grand Rounds ☐
- Work with medical students ☐

### *III. Laboratory / research work* ☐

*IV. Using the medical literature resources (library, Internet)*

Daily ☐  
Once a week ☐  
Less frequently ☐

***To what extent did the program fulfill your expectations? (Please select one best response)***

|               |                          |     |                          |
|---------------|--------------------------|-----|--------------------------|
| 100%          | <input type="checkbox"/> | 75% | <input type="checkbox"/> |
| 50%           | <input type="checkbox"/> | 25% | <input type="checkbox"/> |
| less than 25% | <input type="checkbox"/> |     |                          |

**In case you responded less than 50% to the above question please specify the reason.**

Language barrier ☐  
Did not learn anything new ☐  
Was not able to participate in a scientific project ☐  
Was not able to travel and explore the country ☐

Other \_\_\_\_\_  
\_\_\_\_\_

**E. Changes**

**Did you find the knowledge/skills that you obtained during your placement program useful for yourself in the future? (please select one response):**

|                                       |                          |
|---------------------------------------|--------------------------|
| Did not influence my carrier          | <input type="checkbox"/> |
| Helped me in carrier-building in KSMU | <input type="checkbox"/> |
| Helped me find a new job              | <input type="checkbox"/> |
| Made me want to stay in the USA       | <input type="checkbox"/> |

***After your return from the USA did you continue to work in KSMU?***

YES ☐ NO ☐

**If you answered NO to the previous question, how long were you able to work in KSMU upon return?**

|                                           |                          |
|-------------------------------------------|--------------------------|
| Less than a year                          | <input type="checkbox"/> |
| 1-3 years                                 | <input type="checkbox"/> |
| 3-5 years                                 | <input type="checkbox"/> |
| I am still a faculty/staff member of KSMU | <input type="checkbox"/> |

***If you left KSMU, what was the reason?***

---

---

***Did you sign any contract with KSMU regarding further obligatory employment in the University after your expected return from the USA?***

YES ☐ NO ☐

**F. General Impression about the exchange program**

Please give your evaluation of the main components of the placement (one response for each component):

Very bad **1** Bad **2** Neutral **3** Satisfactory **4** Excellent **5**

|                                                       |           |
|-------------------------------------------------------|-----------|
| General organization of the exchange program          | 1 2 3 4 5 |
| The role of the American side                         | 1 2 3 4 5 |
| Participation of the International Department of KSMU | 1 2 3 4 5 |
| Food                                                  | 1 2 3 4 5 |
| Accommodation in Waterbury                            | 1 2 3 4 5 |
| Accommodation in New Haven                            | 1 2 3 4 5 |
| The trip itself                                       | 1 2 3 4 5 |
| Financial support                                     | 1 2 3 4 5 |
| Availability of the main resources                    | 1 2 3 4 5 |
| Personnel                                             | 1 2 3 4 5 |

Your comments regarding the main components of the exchange program. Your suggestions are highly appreciated.

---

---

---

---

**THANK YOU for your cooperation!**
